# Supplementary material
Source: PubMed Central journal article supplement (PMC10169394)
Supplement: ciac692_supplementary_data.pdf [file ciac692_supplementary_data.pdf]

## Supplemental Material

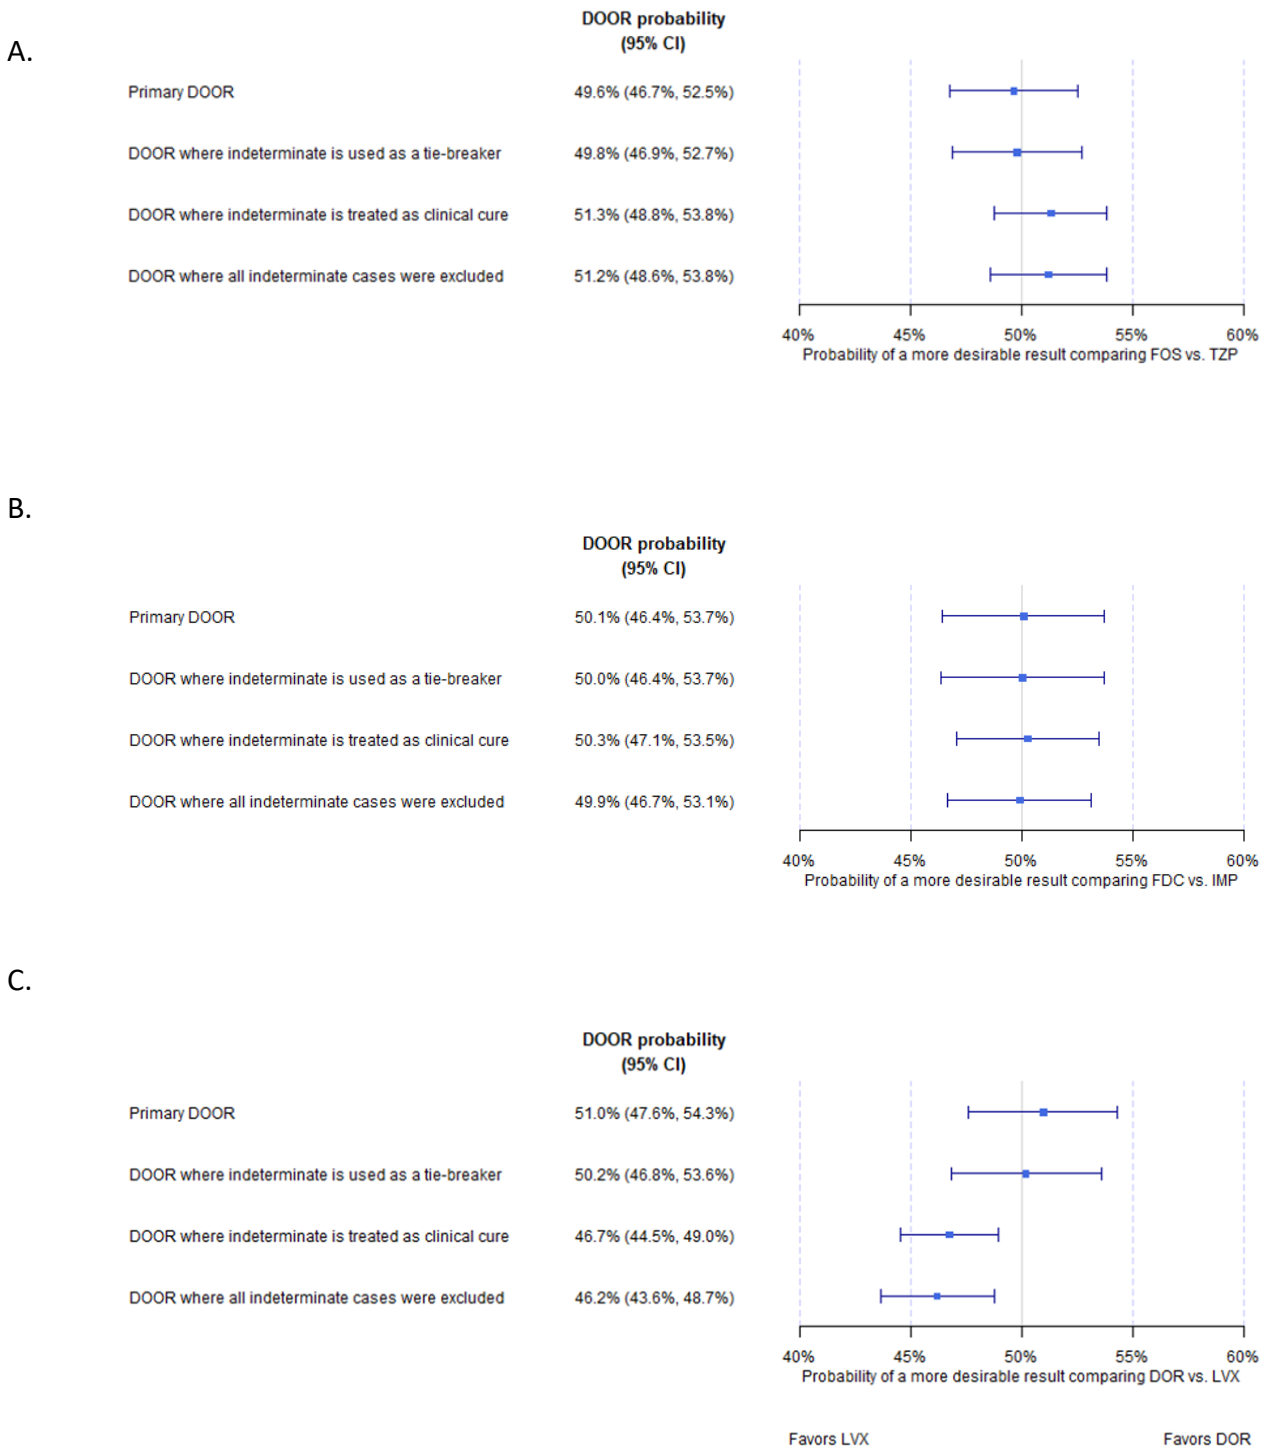

**Supplemental Figure 1:** Estimated desirability of outcome ranking (DOOR) probabilities and associated 95% confidence intervals for sensitivity analyses where we modified how patients with indeterminate or missing clinical outcomes were categorized in the DOOR analysis (A. ZEUS; B. APEKS-cUTI; C. DORI-05).

**Abbreviations:** CI, confidence interval; DOR, doripenem; FDC, cefiderocol; FOS, fosfomycin; IMP, imipenem-cilastatin; LVX, levofloxacin; TZP, piperacillin-tazobactam

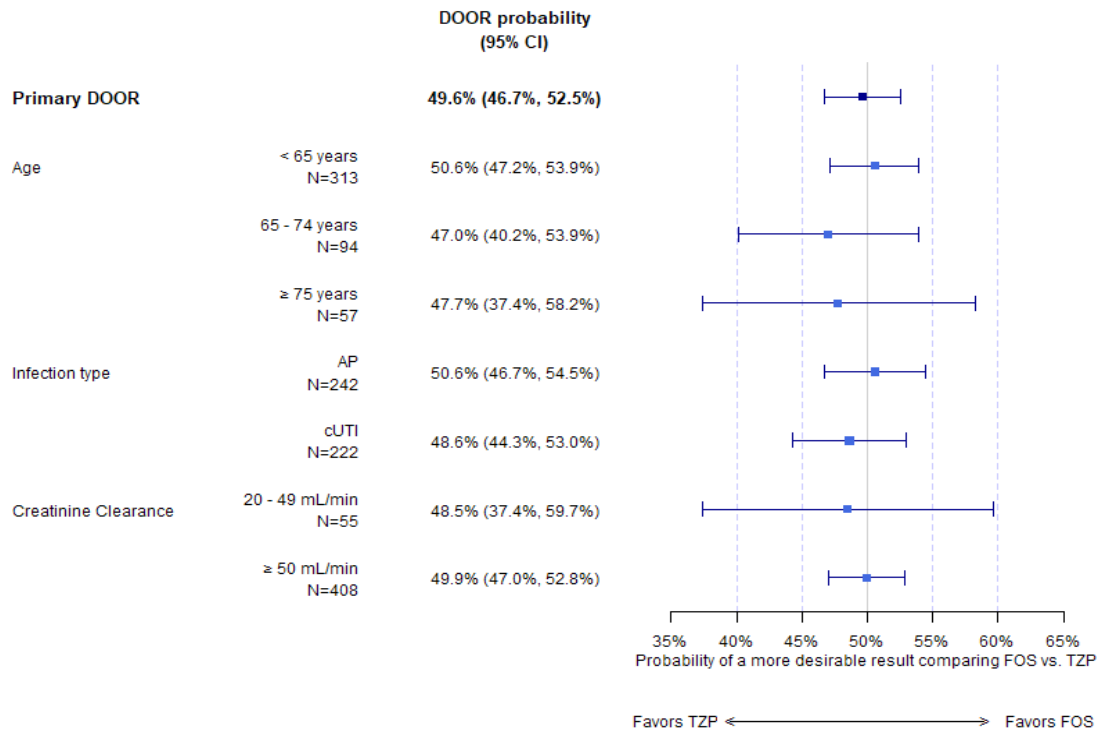

**Supplemental Figure 2:** Estimated desirability of outcome ranking (DOOR) probabilities and associated 95% confidence intervals for all subgroup analyses (age, infection type and creatinine clearance) for ZEUS trial

**Abbreviations:** AP, acute pyelonephritis; CI, confidence interval; cUTI, complicated urinary tract infection; FOS, fosfomycin; TZP, piperacillin-tazobactam

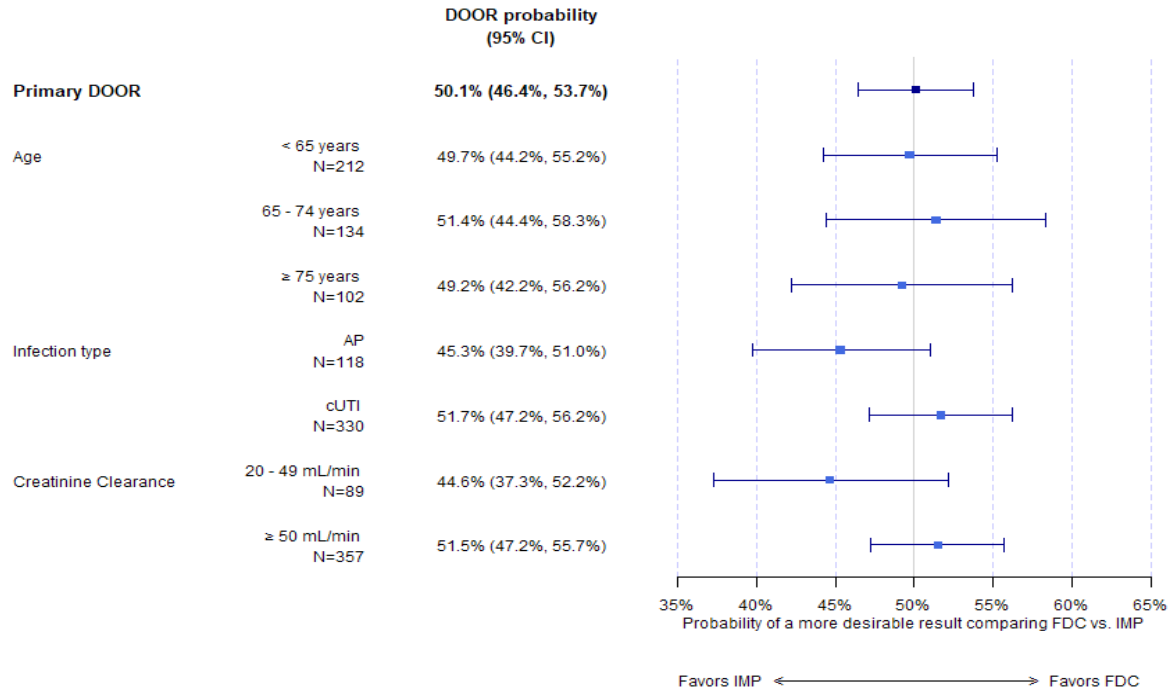

**Supplemental Figure 3:** Estimated desirability of outcome ranking (DOOR) probabilities and associated 95% confidence intervals for all subgroup analyses (age, infection type and creatinine clearance) for APEKS-cUTI trial

**Abbreviations:** AP, acute pyelonephritis; CI, confidence interval; cUTI, complicated urinary tract infection; FDC, cefiderocol; IMP, imipenem

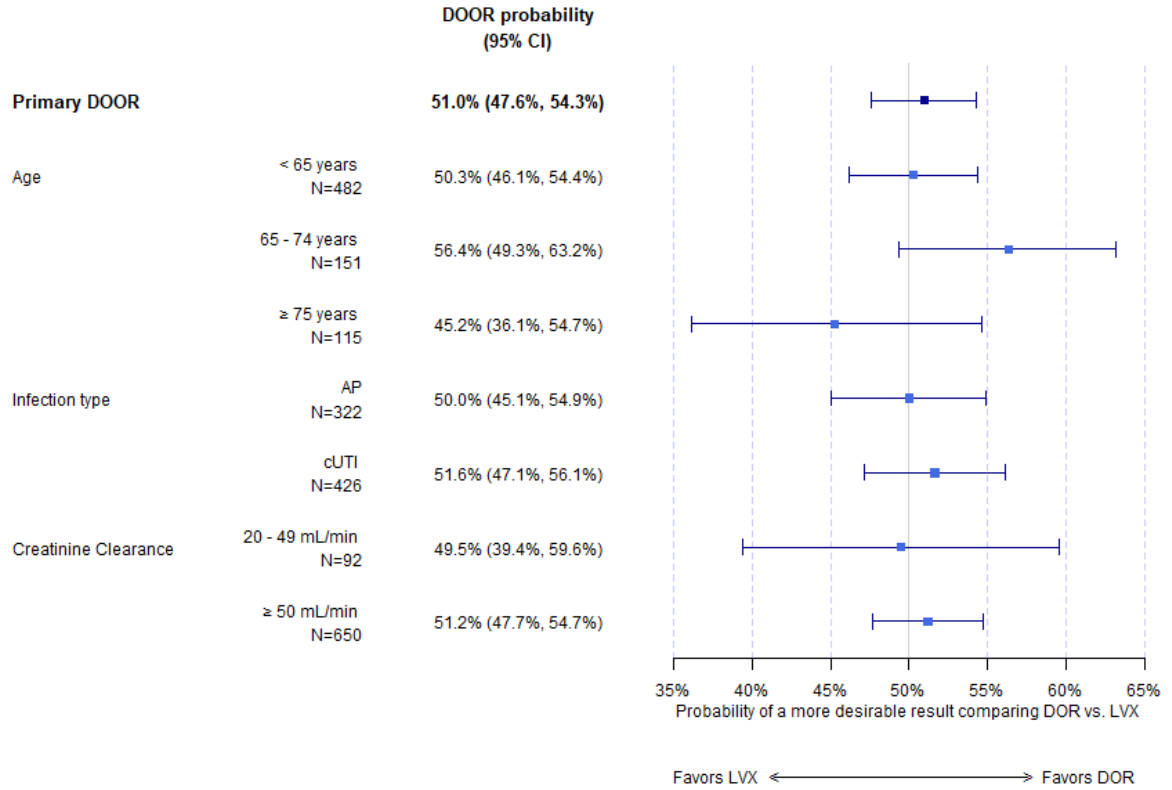

**Supplemental Figure 4:** Estimated desirability of outcome ranking (DOOR) probabilities and associated 95% confidence intervals for all subgroup analyses (age, infection type and creatinine clearance) for DORI-05.

**Abbreviations:** AP, acute pyelonephritis; CI, confidence interval; cUTI, complicated urinary tract infection; DOR, doripenem; LVX, levofloxacin

**Supplemental Table 1: Summary of DOOR Components**

|                                             | ZEUS           |                     | APEKS-cUTI     |                    | DORI-05             |                |
|---------------------------------------------|----------------|---------------------|----------------|--------------------|---------------------|----------------|
|                                             | FOS<br>(n=233) | TZP<br>(n=231)      | FDC<br>(n=300) | IMP<br>(n=148)     | DOR<br>(n=374)      | LVX<br>(n=374) |
| <b>Clinical Assessment at TOC</b>           |                |                     |                |                    |                     |                |
| Cure                                        | 211 (91)       | 212 (92)            | 261 (87)       | 130 (88)           | 293 (78)            | 261 (70)       |
| Failure <sup>a</sup>                        | 11 (5)         | 16 (7)              | 17 (6)         | 8 (5)              | 16 (4)              | 13 (3)         |
| Indeterminate <sup>a</sup>                  | 11 (5)         | 3 (1)               | 22 (7)         | 10 (7)             | 1 (<1)              | 2 (<1)         |
| Missing <sup>a,b</sup>                      |                |                     |                |                    | 64 (17)             | 98 (26)        |
| <b>Infectious Complications<sup>c</sup></b> |                |                     |                |                    |                     |                |
| Renal or intra-abdominal abscess            | 0 (0)          | 2 (<1)              | 1 (<1)         | 0 (0)              | 2 (<1) <sup>d</sup> | 0 (0)          |
| Bacteremia                                  | 0 (0)          | 1 (<1) <sup>e</sup> | 0 (0)          | 0 (0)              | 0 (0)               | 0 (0)          |
| Recurrent UTI/pyelonephritis <sup>f</sup>   | 3 (1)          | 2 (<1)              | 1 (1)          | 2 (1) <sup>g</sup> | 21 (6) <sup>h</sup> | 5 (1)          |
| <i>Clostridioides difficile</i>             | 0 (0)          | 1 (<1)              | 1 (<1)         | 5 (3)              | 1 (<1)              | 0(0)           |
| Epididymo-orchitis                          | 1 (<1)         | 0 (0)               | 0 (0)          | 0 (0)              | 1 (<1)              | 0 (0)          |
| Prostatic abscess                           | 1 (<1)         | 0 (0)               | 0 (0)          | 1 (<1)             | 0 (0)               | 0 (0)          |
| <b>≥1 SAE</b>                               | 5 (2)          | 6 (3)               | 15 (5)         | 11 (7)             | 25 (7)              | 14 (4)         |
| <b>Death</b>                                | 0 (0)          | 0 (0)               | 1 (<1)         | 0 (0)              | 1 (<1)              | 0 (0)          |

Displayed as n (%) unless otherwise stated

- a. Included in the primary DOOR analysis as “absence of clinical response”
- b. Includes assessments that were completed outside the prespecified test of cure visit time frame
- c. A patient can have more than one infectious complication; however even if a patient has more than one infectious complication they are still counted as having one DOOR event (i.e. an “infectious complication”)
- d. One of these events was coded as “intra-abdominal infection” and ARLG physician reviewers agreed this should count in the intra-abdominal abscess category
- e. This patient was coded as having a renal abscess and septicemia
- f. Occurred after test of cure
- g. One of the adverse events was coded as “percutaneous nephrostomy tube infection” which the ARLG physician reviewers agreed should count as recurrent UTI/pyelonephritis
- h. Two events were coded as “urosepsis” which the ARLG physician reviewers agreed should count as recurrent UTI/pyelonephritis. Information about whether these patients had associated bacteremia was not available.

**Abbreviations:** DOR, doripenem; FDC, cefiderocol; FOS, fosfomycin; IMP, imipenem-cilastatin; LVX, levofloxacin; SAE, serious adverse event; TOC, test of cure; TZP, piperacillin-tazobactam; UTI, urinary tract infection
